# Supplementary material for: Opportunities and challenges in design and optimization of protein function
Source: Springer Nature journal article supplement (doi:10.1038/s41580-024-00718-y), 2024-04-02
Supplement: 41580_2024_718_MOESM1_ESM.pdf [file 41580_2024_718_MOESM1_ESM.pdf]

---

# Opportunities and challenges in design and optimization of protein function

---

In the format provided by the authors and unedited

## Supplementary Box 1. **Methods for statistical comparison of computed and natural proteins**

We extracted *de novo* designed proteins from the [Protein Data Bank](#), including 84 monomeric proteins and 17 designed binders complexed with their targets. We randomly sampled 1,000 natural proteins from the CATH database (version 4.3)<sup>1</sup>. The natural protein binders were taken from the molecular surface interaction fingerprinting (MaSIF) testset, which contains 936 structures<sup>2</sup>.

Relative Contact Order (RCO) is determined by measuring the sequence distance between secondary structures for all residue pairs within 8 Å (defined as contacts). If the contacts are separated by more than four residues in sequence, the average distance of these contacts is calculated. [DSSP](#) was used to determine the secondary structure element (SSE) content of the protein<sup>3</sup>.

The script used for the generation of these figures is available at [https://github.com/casperg92/opportunities\\_in\\_protein\\_design\\_review](https://github.com/casperg92/opportunities_in_protein_design_review).

### **References**

1. Sillitoe, I. *et al.* CATH: increased structural coverage of functional space. *Nucleic Acids Res.* **49**, D266–D273 (2021).
2. Gainza, P. *et al.* De novo design of protein interactions with learned surface fingerprints. *Nature* **617**, 176–184 (2023).
3. Kabsch, W. & Sander, C. Dictionary of protein secondary structure: pattern recognition of hydrogen-bonded and geometrical features. *Biopolymers* **22**, 2577–2637 (1983).
